# Supplementary material for: Small-size recombinant adenoviral hexon protein fragments for the production of virus-type specific antibodies
Source: PubMed Central journal article supplement (PMC5563037; doi:10.1186/s12985-017-0822-5), 2017-08-18

A

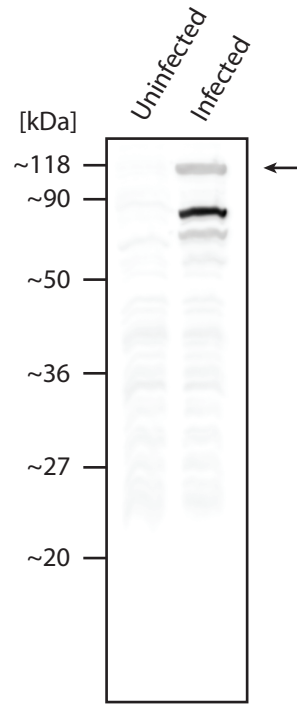

Supplement: 12985_2017_822_MOESM4_ESM.pdf [file 12985_2017_822_MOESM4_ESM.pdf]
