# Supplementary material for: Small-size recombinant adenoviral hexon protein fragments for the production of virus-type specific antibodies
Source: Springer Nature journal article supplement (doi:10.1186/s12985-017-0822-5), 2017-08-18
Supplement: MOESM1 [file 14225180]

Supplemental Figure 1

A

Sequence alignment for HVR1 region (positions 10-85) across various strains including BAdV-E6, HAdV-B3, HAdV-B7, HAdV-B16, HAdV-B21, HAdV-B35, HAdV-C2, HAdV-C5, HAdV-D8, HAdV-D30, HAdV-D37, HAdV-E4, HAdV-F40, HAdV-G52, MadV-1, MadV-2, MadV-3, and SAdV-C19.

Sequence alignment for Hexon fragment region (positions 86-170) across various strains including BAdV-E6, HAdV-B3, HAdV-B7, HAdV-B16, HAdV-B21, HAdV-B35, HAdV-C2, HAdV-C5, HAdV-D8, HAdV-D30, HAdV-D37, HAdV-E4, HAdV-F40, HAdV-G52, MadV-1, MadV-2, MadV-3, and SAdV-C19.

Sequence alignment for Hexon fragment region (positions 190-260) across various strains including BAdV-E6, HAdV-B3, HAdV-B7, HAdV-B16, HAdV-B21, HAdV-B35, HAdV-C2, HAdV-C5, HAdV-D8, HAdV-D30, HAdV-D37, HAdV-E4, HAdV-F40, HAdV-G52, MadV-1, MadV-2, MadV-3, and SAdV-C19.

Sequence alignment for Hexon fragment region (positions 280-350) across various strains including BAdV-E6, HAdV-B3, HAdV-B7, HAdV-B16, HAdV-B21, HAdV-B35, HAdV-C2, HAdV-C5, HAdV-D8, HAdV-D30, HAdV-D37, HAdV-E4, HAdV-F40, HAdV-G52, MadV-1, MadV-2, MadV-3, and SAdV-C19.

Sequence alignment for Hexon f. region (positions 370-440) across various strains including BAdV-E6, HAdV-B3, HAdV-B7, HAdV-B16, HAdV-B21, HAdV-B35, HAdV-C2, HAdV-C5, HAdV-D8, HAdV-D30, HAdV-D37, HAdV-E4, HAdV-F40, HAdV-G52, MadV-1, MadV-2, MadV-3, and SAdV-C19.
